# Supplementary material for: Both magnetic relaxation and luminescence of Zn2Dy2 cluster complexes regulated by the bis-imine chain in Schiff base ligands
Source: Royal Society of Chemistry journal article supplement (doi:10.1039/c9nj03659h), 2019-01-01
Supplement: c9nj03659h1.pdf [file c9nj03659h1.pdf]

## **Both magnetic relaxation and luminescence of $Zn_2Dy_2$ cluster complexes regulated by the bis-imine chain in Schiff base ligands**

Cai-Ming Liu,<sup>†\*</sup> De-Qing Zhang,<sup>†</sup> Yi-Quan Zhang,<sup>\*,‡</sup> Miao Li,<sup>‡</sup> and Dao-Ben Zhu<sup>†</sup>

*<sup>†</sup>Beijing National Laboratory for Molecular Sciences, Center for Molecular Science, Key Laboratory of Organic Solids, Institute of Chemistry, CAS Research/Education Center for Excellence in Molecular Science, Chinese Academy of Sciences, Beijing 100190, China.*

*<sup>‡</sup>Jiangsu Key Laboratory for NSLSCS, School of Physical Science and Technology, Nanjing Normal University, Nanjing, 210023, China.*

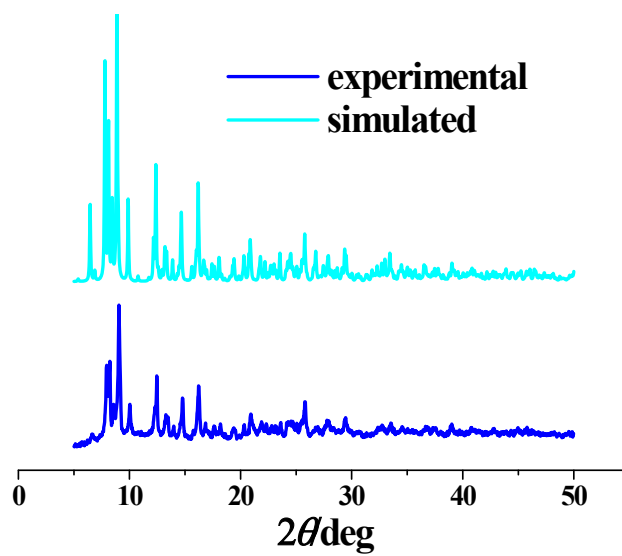

**Fig. S1.** The simulative and experimental powder X-ray diffraction patterns for **1**.

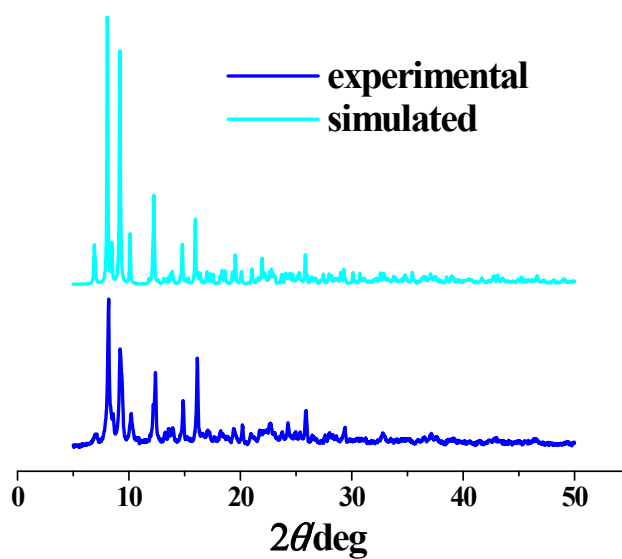

**Fig. S2.** The simulative and experimental powder X-ray diffraction patterns for **2**.

**Table S1.** Continuous Shape Measures calculation for Dy1 atom in **1**.

Dy1 structure

|          |        |                                    |
|----------|--------|------------------------------------|
| EP-9     | 1 D9h  | Enneagon                           |
| OPY-9    | 2 C8v  | Octagonal pyramid                  |
| HBPY-9   | 3 D7h  | Heptagonal bipyramid               |
| JTC-9    | 4 C3v  | Johnson triangular cupola J3       |
| JCCU-9   | 5 C4v  | Capped cube J8                     |
| CCU-9    | 6 C4v  | Spherical-relaxed capped cube      |
| JCSAPR-9 | 7 C4v  | Capped square antiprism J10        |
| CSAPR-9  | 8 C4v  | Spherical capped square antiprism  |
| JTCTPR-9 | 9 D3h  | Tricapped trigonal prism J51       |
| TCTPR-9  | 10 D3h | Spherical tricapped trigonal prism |
| JTDIC-9  | 11 C3v | Tridiminished icosahedron J63      |
| HH-9     | 12 C2v | Hula-hoop                          |
| MFF-9    | 13 Cs  | Muffin                             |

| Structure [ML9] | EP-9    | OPY-9   | HBPY-9  | JTC-9   | JCCU-9 | CCU-9  | JCSAPR-9 | CSAPR-9 | JTCTPR-9 | TCTPR-9 | JTDIC-9 | HH-9   | MFF-9        |
|-----------------|---------|---------|---------|---------|--------|--------|----------|---------|----------|---------|---------|--------|--------------|
| ABOXIY,         | 34.294, | 21.784, | 17.181, | 14.367, | 7.265, | 6.387, | 3.750,   | 2.454,  | 4.595,   | 3.448,  | 11.576, | 6.761, | <b>2.257</b> |

**Table S2.** Continuous Shape Measures calculation for Dy2 atom in **1**.

Dy2 structure

|          |        |                                            |
|----------|--------|--------------------------------------------|
| OP-8     | 1 D8h  | Octagon                                    |
| HPY-8    | 2 C7v  | Heptagonal pyramid                         |
| HBPY-8   | 3 D6h  | Hexagonal bipyramid                        |
| CU-8     | 4 Oh   | Cube                                       |
| SAPR-8   | 5 D4d  | Square antiprism                           |
| TDD-8    | 6 D2d  | Triangular dodecahedron                    |
| JGBF-8   | 7 D2d  | Johnson gyrobifastigium J26                |
| JETBPY-8 | 8 D3h  | Johnson elongated triangular bipyramid J14 |
| JBTPR-8  | 9 C2v  | Biaugmented trigonal prism J50             |
| BTPR-8   | 10 C2v | Biaugmented trigonal prism                 |
| JSD-8    | 11 D2d | Snub diphenoid J84                         |
| TT-8     | 12 Td  | Triakis tetrahedron                        |
| ETBPY-8  | 13 D3h | Elongated trigonal bipyramid               |

| Structure [ML8] | OP-8    | HPY-8   | HBPY-8  | CU-8    | SAPR-8 | TDD-8  | JGBF-8 | JETBPY-8 | JBTPR-8 | BTPR-8 | JSD-8         | TT-8    | ETBPY-8 |
|-----------------|---------|---------|---------|---------|--------|--------|--------|----------|---------|--------|---------------|---------|---------|
| ABOXIY,         | 31.758, | 26.314, | 13.193, | 11.548, | 4.793, | 2.632, | 9.335, | 25.139,  | 3.698,  | 3.452, | <b>2.618,</b> | 12.319, | 21.496  |

**Table S3.** Continuous Shape Measures calculation for Dy1 atom in **2**.

Dy1 structure

|          |        |                                    |
|----------|--------|------------------------------------|
| EP-9     | 1 D9h  | Enneagon                           |
| OPY-9    | 2 C8v  | Octagonal pyramid                  |
| HBPY-9   | 3 D7h  | Heptagonal bipyramid               |
| JTC-9    | 4 C3v  | Johnson triangular cupola J3       |
| JCCU-9   | 5 C4v  | Capped cube J8                     |
| CCU-9    | 6 C4v  | Spherical-relaxed capped cube      |
| JCSAPR-9 | 7 C4v  | Capped square antiprism J10        |
| CSAPR-9  | 8 C4v  | Spherical capped square antiprism  |
| JTCTPR-9 | 9 D3h  | Tricapped trigonal prism J51       |
| TCTPR-9  | 10 D3h | Spherical tricapped trigonal prism |
| JTDIC-9  | 11 C3v | Tridiminished icosahedron J63      |
| HH-9     | 12 C2v | Hula-hoop                          |
| MFF-9    | 13 Cs  | Muffin                             |

Structure [ML9] EP-9 OPY-9 HBPY-9 JTC-9 JCCU-9 CCU-9 JCSAPR-9 CSAPR-9 JTCTPR-9 TCTPR-9 JTDIC-9 HH-9 **MFF-9**  
 ABOXIY, 34.056, 21.742, 17.667, 14.731, 7.411, 6.714, 4.392, 2.989, 5.183, 3.808, 11.241, 6.640, **2.832**

**Table S4.** Continuous Shape Measures calculation for Dy2 atom in **2**.

Dy2 structures

|          |        |                                            |
|----------|--------|--------------------------------------------|
| OP-8     | 1 D8h  | Octagon                                    |
| HPY-8    | 2 C7v  | Heptagonal pyramid                         |
| HBPY-8   | 3 D6h  | Hexagonal bipyramid                        |
| CU-8     | 4 Oh   | Cube                                       |
| SAPR-8   | 5 D4d  | Square antiprism                           |
| TDD-8    | 6 D2d  | Triangular dodecahedron                    |
| JGBF-8   | 7 D2d  | Johnson gyrobifastigium J26                |
| JETBPY-8 | 8 D3h  | Johnson elongated triangular bipyramid J14 |
| JBTPR-8  | 9 C2v  | Biaugmented trigonal prism J50             |
| BTPR-8   | 10 C2v | Biaugmented trigonal prism                 |
| JSD-8    | 11 D2d | Snub diphendoid J84                        |
| TT-8     | 12 Td  | Triakis tetrahedron                        |
| ETBPY-8  | 13 D3h | Elongated trigonal bipyramid               |

Structure [ML8] OP-8 HPY-8 HBPY-8 CU-8 SAPR-8 TDD-8 JGBF-8 JETBPY-8 JBTPR-8 **BTPR-8** JSD-8 TT-8 ETBPY-8  
 ABOXIY, 33.066, 25.974, 13.060, 11.125, 4.955, 2.763, 9.094, 24.732, 3.977, 3.783, **2.616**, 11.836, 21.079

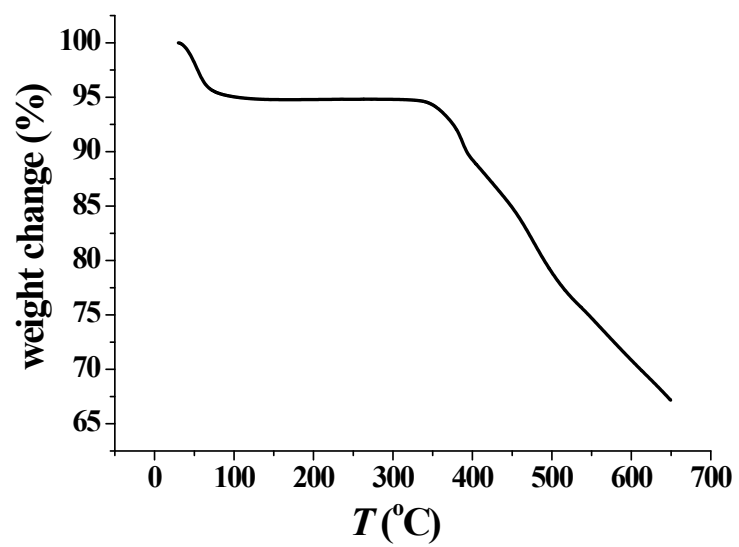

**Fig. S3.** TGA curve for **1**.

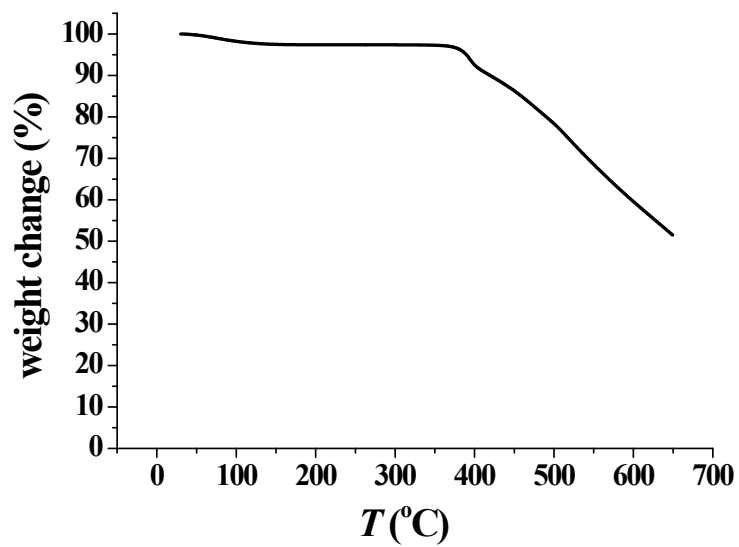

**Fig. S4.** TGA curve for **2**.

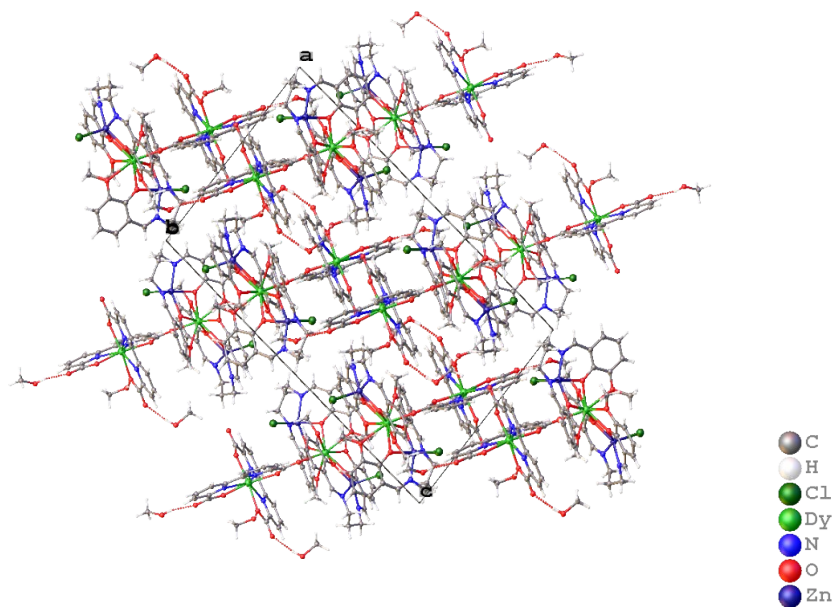

**Fig. S5.** Unit cell packing diagram of 1.

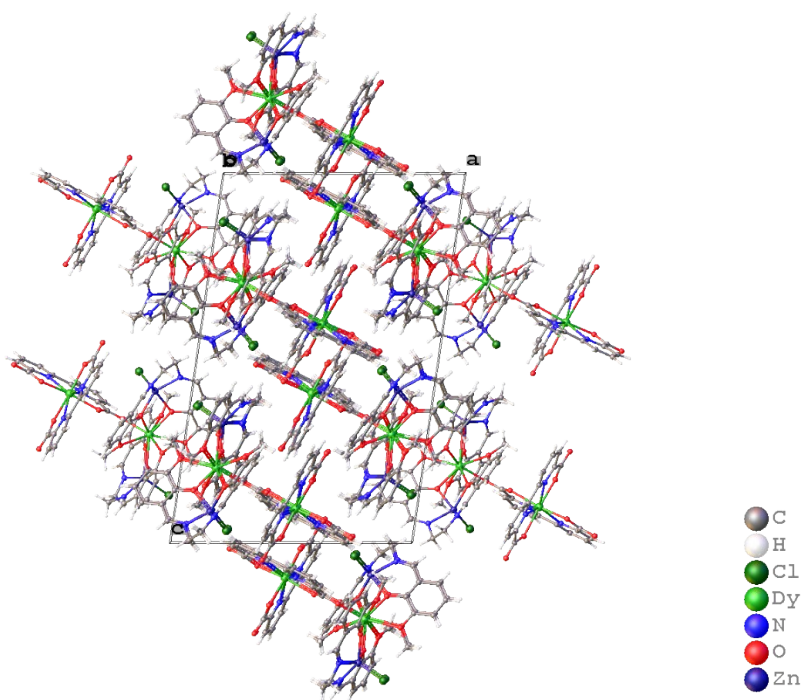

**Fig. S6.** Unit cell packing diagram of 2.

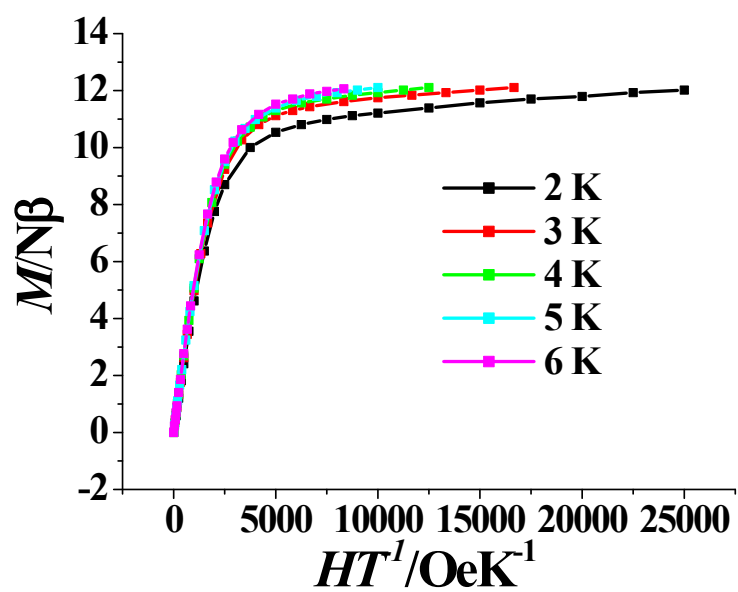

Fig. S7.  $M$  versus  $H/T$  plots at 2-6 K of 1.

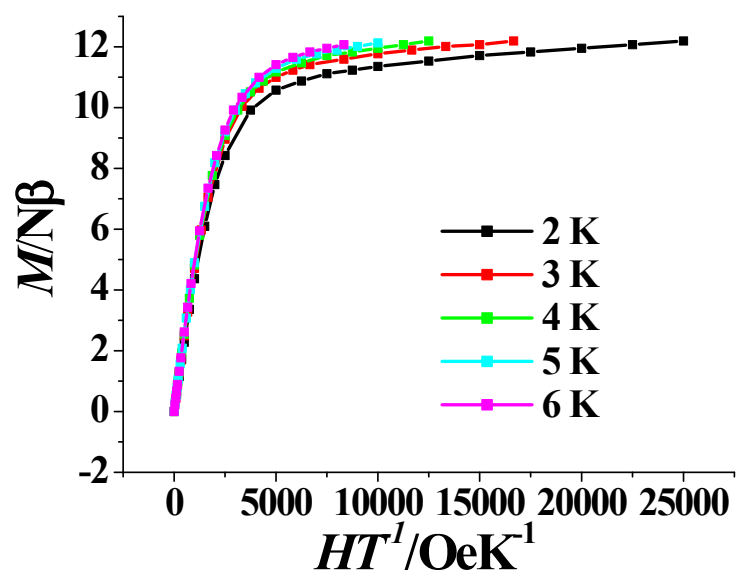

Fig. S8.  $M$  versus  $H/T$  plots at 2-6 K of 2.

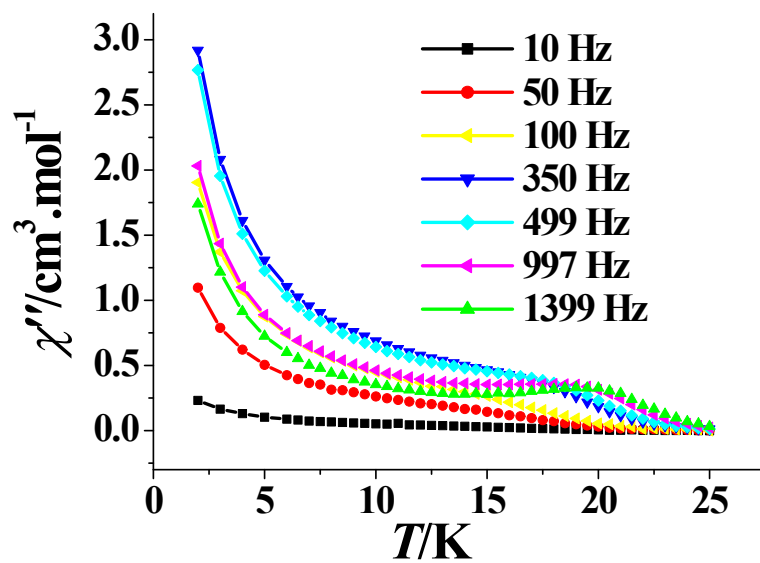

**Fig. S9.** Temperature dependence of  $\chi''$  for **1** under zero dc field.

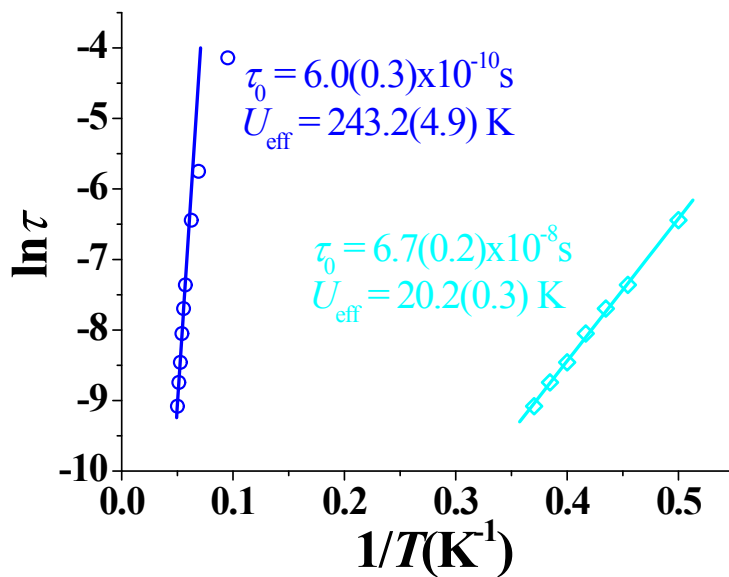

**Fig. S10.** Plot of  $\ln(\tau)$  versus  $1/T$  for **1** ( $H_{dc} = 1500$  Oe), the solid lines represent the best fitting with the Arrhenius law.



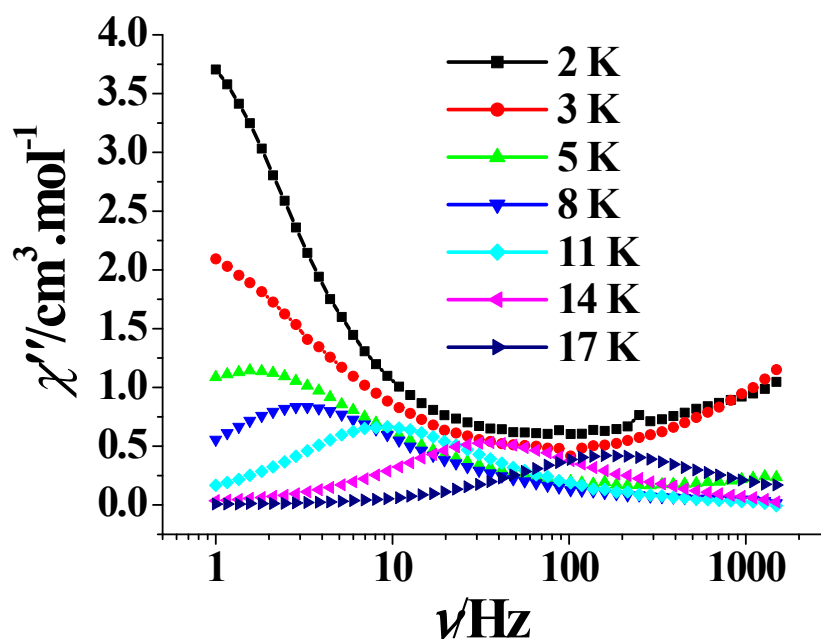

**Fig. S11.** Frequency dependence of  $\chi''$  for **1** under 1500 Oe dc field.

**Table S5.** Linear combination of two modified Debye model fitting parameters from 2 K to 17 K of **1** under 1500 Oe dc field.

| $T(\text{K})$ | $\chi_2(\text{cm}^3 \cdot \text{mol}^{-1})$ | $\chi_1(\text{cm}^3 \cdot \text{mol}^{-1})$ | $\chi_0(\text{cm}^3 \cdot \text{mol}^{-1})$ | $\tau_1(\text{s})$ | $\alpha_1$ | $\tau_2(\text{s})$ | $\alpha_2$ |
|---------------|---------------------------------------------|---------------------------------------------|---------------------------------------------|--------------------|------------|--------------------|------------|
| 2             | 15.69826                                    | 10.0573                                     | 0.09782                                     | 0.25209            | 0.150757   | 0.00003            | 0.53864    |
| 3             | 13.50628                                    | 8.04205                                     | 0.59724                                     | 0.28748            | 0.32728    | 0.00002            | 0.37736    |
| 5             | 8.07234                                     | 6.68125                                     | 3.30738                                     | 0.10073            | 0.24662    | 0.00001            | 0.41086    |
| 8             | 5.19995                                     | 3.54216                                     | 3.03447                                     | 0.01604            | 0.44042    | 0.05292            | 0.08083    |
| 11            | 3.79315                                     | 3.54796                                     | 2.25409                                     | 0.01865            | 0.03747    | 0.00428            | 0.17766    |
| 14            | 2.98824                                     | 1.48366                                     | 1.75786                                     | 0.02027            | 0.11029    | 0.00509            | 0.15643    |
| 17            | 2.45627                                     | 1.9286                                      | 1.46514                                     | 0.00046            | 0.11788    | 0.00126            | 0.00006    |

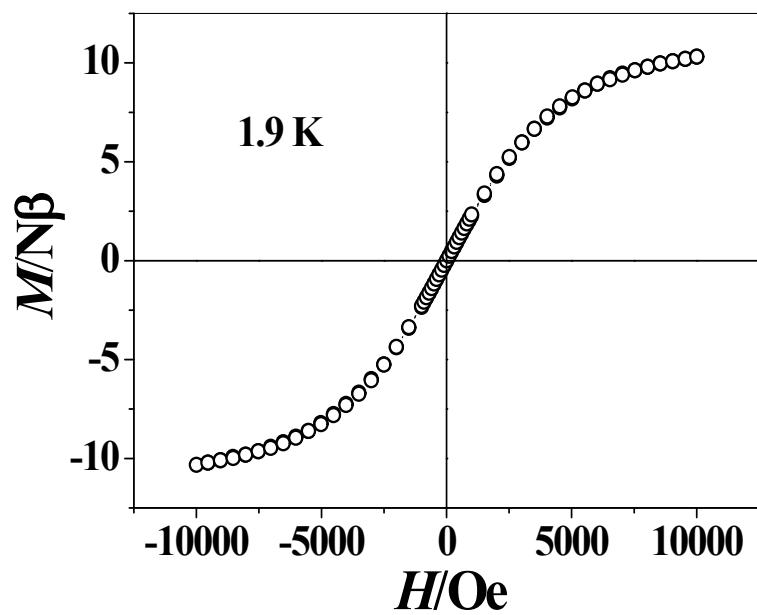

Fig. S12. Hysteresis loop for 1 at 1.9 K.

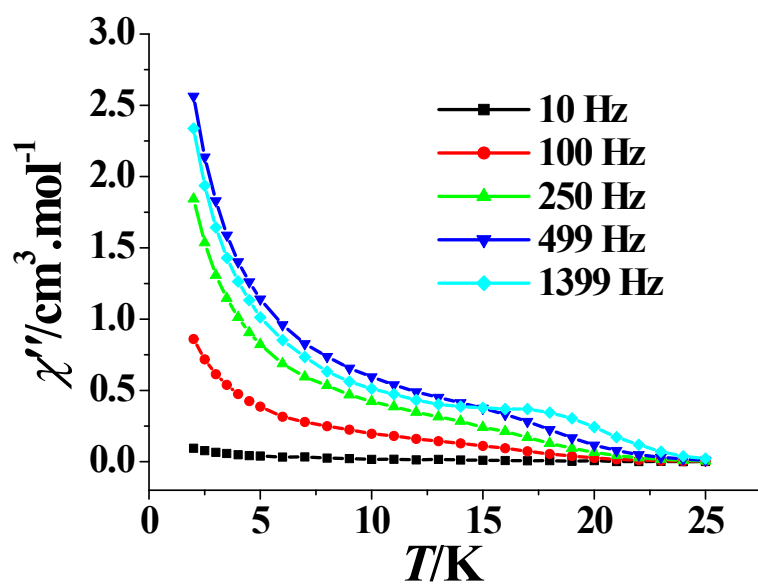

Fig. S13. Temperature dependence of  $\chi''$  for 2 under zero dc field.

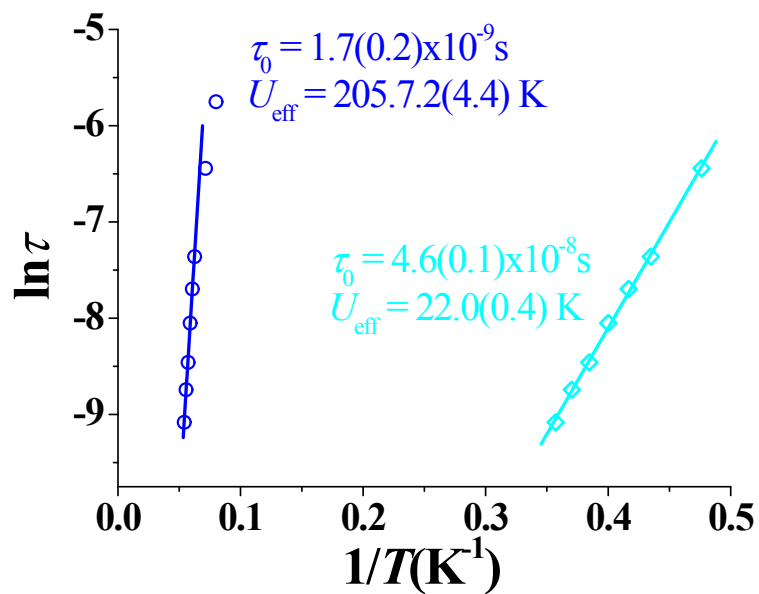

**Fig. S14.** Plot of  $\ln(\tau)$  versus  $1/T$  for **2** ( $H_{\text{dc}} = 1500 \text{ Oe}$ ), the solid lines represent the best fitting with the Arrhenius law.

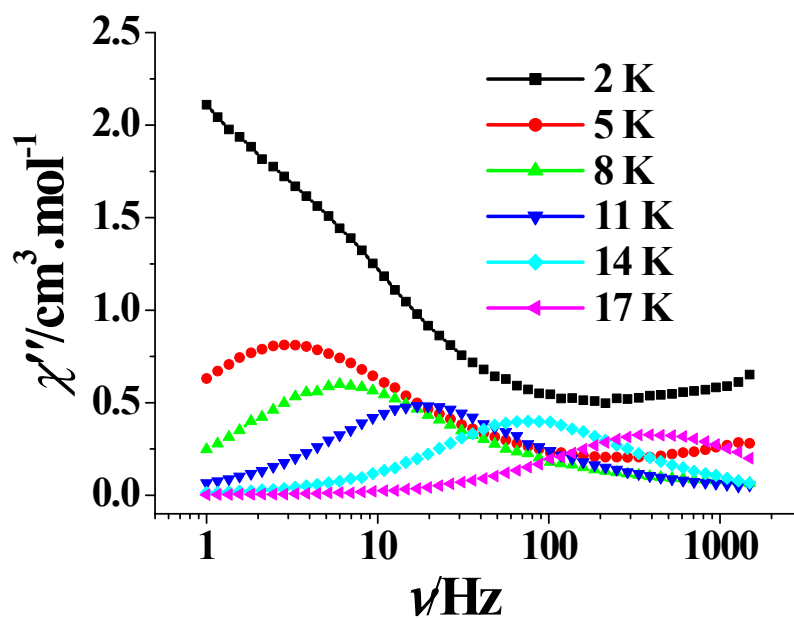

**Fig. S15.** Frequency dependence of  $\chi''$  for **2** under 1500 Oe dc field.

**Table S6.** Linear combination of two modified Debye model fitting parameters from 2 K to 17 K of **2** under 1500 Oe dc field.

| $T(\text{K})$ | $\chi_2(\text{cm}^3.\text{mol}^{-1})$ | $\chi_1(\text{cm}^3.\text{mol}^{-1})$ | $\chi_0(\text{cm}^3.\text{mol}^{-1})$ | $\tau_1(\text{s})$ | $\alpha_1$ | $\tau_2(\text{s})$ | $\alpha_2$ |
|---------------|---------------------------------------|---------------------------------------|---------------------------------------|--------------------|------------|--------------------|------------|
| 2             | 13.44281                              | 11.85827                              | 2.10398                               | 0.28773            | 0.47896    | 0.00006            | 0.22159    |
| 5             | 5.6251                                | 3.5898                                | 1.16452                               | 0.05286            | 0.26035    | 7.3061E-6          | 0.4617     |
| 8             | 3.62035                               | 3.22313                               | 1.87454                               | 0.02564            | 0.13496    | 0.00119            | 0.5608     |
| 11            | 2.65751                               | 1.56995                               | 1.31141                               | 0.00004            | 0.57986    | 0.00843            | 0.08645    |
| 14            | 2.08701                               | 1.53578                               | 1.15377                               | 0.00107            | 0.12284    | 0.00265            | 0.00568    |
| 17            | 1.73009                               | 1.10962                               | 0.95919                               | 0.00016            | 0.00003    | 0.00047            | 0.06977    |

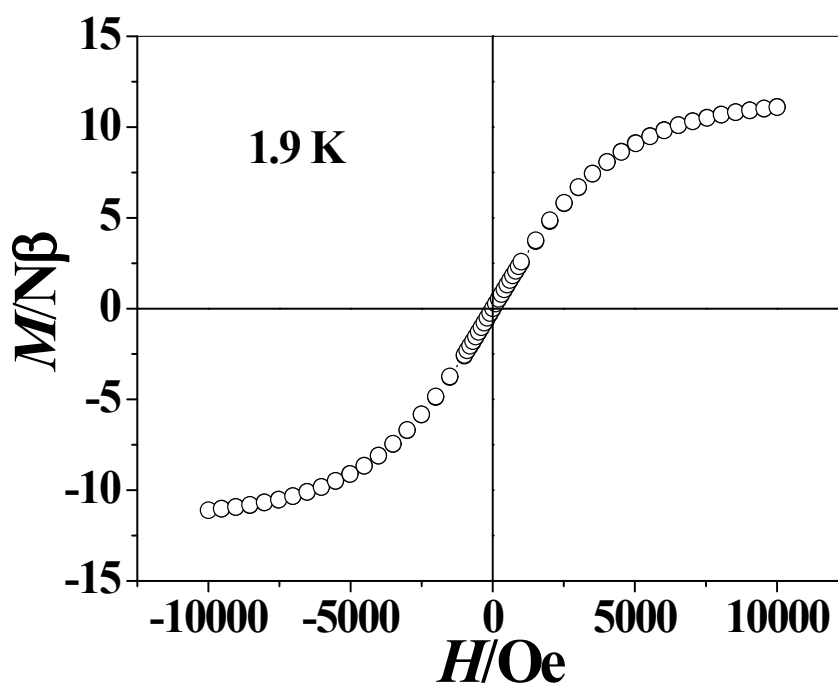

**Fig. S16.** Hysteresis loop for **2** at 1.9 K.

## Computational details

Each binuclear complexes **1** and **2** has two types of Dy<sup>III</sup> fragments indicated as **1(Dy1)**, **1(Dy2)**, **2(Dy1)** and **2(Dy2)**. Complete-active-space self-consistent field (CASSCF) calculations on individual Dy<sup>III</sup> fragments (see Figure S13 for the calculated structures of complexes **1** and **2**) for compounds **1** and **2** on the basis of single-crystal X-ray determined geometry have been carried out with MOLCAS 8.2<sup>S1</sup> program package. Each individual Dy<sup>III</sup> fragment in **1** and **2** was calculated keeping the experimentally determined structure of the corresponding compound while replacing the neighboring Dy<sup>III</sup> ion by diamagnetic Lu<sup>III</sup>.

The basis sets for all atoms are atomic natural orbitals from the MOLCAS ANO-RCC library: ANO-RCC-VTZP for Dy<sup>III</sup>; VTZ for close N and O; VDZ for distant atoms. The calculations employed the second order Douglas-Kroll-Hess Hamiltonian, where scalar relativistic contractions were taken into account in the basis set and the spin-orbit couplings were handled separately in the restricted active space state interaction (RASSI-SO) procedure. Active electrons in 7 active spaces include all *f* electrons (CAS(9 in 7 for Dy<sup>III</sup>)) in the CASSCF calculation. To exclude all the doubts, we calculated all the roots in the active space. We have mixed the maximum number of spin-free state which was possible with our hardware (all from 21 sextets, 128 from 224 quadruplets, 130 from 490 doublets). SINGLE\_ANISO<sup>S2</sup> program was used to obtain the energy levels, *g* tensors, *m<sub>J</sub>* values, magnetic axes, *et al.*, based on the above CASSCF/RASSI-SO calculations.

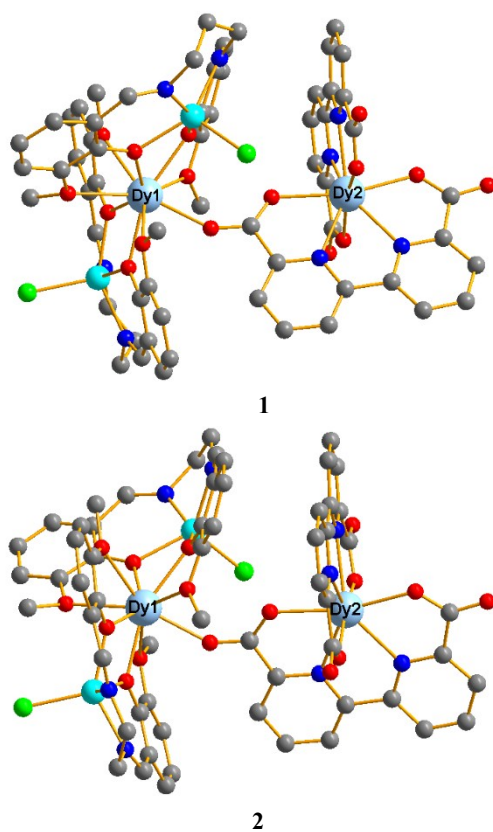

**Fig. S17.** Calculated structures of complexes **1** and **2**; H atoms are omitted.

**Table S7.** Calculated energy levels ( $\text{cm}^{-1}$ ),  $\mathbf{g}$  ( $g_x, g_y, g_z$ ) tensors and predominant  $m_J$  values of the lowest eight Kramers doublets (KDs) of individual  $\text{Dy}^{\text{III}}$  fragments of complexes **1** and **2** using CASSCF/RASSI-SO with MOLCAS 8.2.

| KDs | <b>1(Dy1)</b>      |              |            | <b>1(Dy2)</b>      |              |            |
|-----|--------------------|--------------|------------|--------------------|--------------|------------|
|     | $E/\text{cm}^{-1}$ | $\mathbf{g}$ | $m_J$      | $E/\text{cm}^{-1}$ | $\mathbf{g}$ | $m_J$      |
| 1   | 0.0                | 0.002        | $\pm 15/2$ | 0.0                | 0.026        | $\pm 15/2$ |
|     |                    | 0.002        |            |                    | 0.030        |            |
|     |                    | 19.783       |            |                    | 19.671       |            |
| 2   | 156.6              | 0.057        | $\pm 13/2$ | 136.6              | 1.164        | $\pm 7/2$  |
|     |                    | 0.081        |            |                    | 2.907        |            |
|     |                    | 18.091       |            |                    | 16.401       |            |
| 3   | 252.7              | 0.436        | $\pm 11/2$ | 184.4              | 0.209        | $\pm 13/2$ |
|     |                    | 0.999        |            |                    | 3.434        |            |
|     |                    | 12.643       |            |                    | 14.276       |            |
| 4   | 302.6              | 1.114        | $\pm 7/2$  | 262.6              | 0.859        | $\pm 9/2$  |
|     |                    | 4.351        |            |                    | 2.201        |            |
|     |                    | 14.420       |            |                    | 14.697       |            |
| 5   | 320.7              | 8.424        | $\pm 3/2$  | 347.2              | 4.893        | $\pm 11/2$ |
|     |                    | 4.969        |            |                    | 3.954        |            |
|     |                    | 1.215        |            |                    | 2.786        |            |

|     |                          |                          |                      |                          |                          |                      |
|-----|--------------------------|--------------------------|----------------------|--------------------------|--------------------------|----------------------|
| 6   | 365.3                    | 0.603<br>1.853<br>15.223 | $\pm 9/2$            | 380.5                    | 1.516<br>2.838<br>15.073 | $\pm 5/2$            |
| 7   | 424.4                    | 1.285<br>2.136<br>14.172 | $\pm 1/2$            | 470.0                    | 1.852<br>2.837<br>12.702 | $\pm 3/2$            |
| 8   | 591.6                    | 0.095<br>0.208<br>18.856 | $\pm 5/2$            | 555.8                    | 0.596<br>1.273<br>16.556 | $\pm 1/2$            |
| KDs | <b>2(Dy1)</b>            |                          |                      | <b>2(Dy2)</b>            |                          |                      |
|     | <i>E/cm<sup>-1</sup></i> | <i>g</i>                 | <i>m<sub>J</sub></i> | <i>E/cm<sup>-1</sup></i> | <i>g</i>                 | <i>m<sub>J</sub></i> |
| 1   | 0.0                      | 0.003<br>0.004<br>19.778 | $\pm 15/2$           | 0.0                      | 0.023<br>0.025<br>19.713 | $\pm 15/2$           |
| 2   | 151.9                    | 0.075<br>0.103<br>18.085 | $\pm 13/2$           | 165.9                    | 1.071<br>4.654<br>14.498 | $\pm 9/2$            |
| 3   | 255.8                    | 0.271<br>0.707<br>12.928 | $\pm 11/2$           | 204.4                    | 0.341<br>5.437<br>12.327 | $\pm 13/2$           |
| 4   | 289.2                    | 0.164<br>1.040<br>17.731 | $\pm 9/2$            | 298.7                    | 2.328<br>3.837<br>14.720 | $\pm 7/2$            |
| 5   | 332.2                    | 3.962<br>5.554<br>9.060  | $\pm 5/2$            | 376.9                    | 3.207<br>4.768<br>7.654  | $\pm 11/2$           |
| 6   | 363.1                    | 0.354<br>0.551<br>15.695 | $\pm 7/2$            | 433.0                    | 0.506<br>0.969<br>17.853 | $\pm 1/2$            |
| 7   | 434.2                    | 1.248<br>2.255<br>14.233 | $\pm 1/2$            | 508.9                    | 1.330<br>2.064<br>13.482 | $\pm 5/2$            |
| 8   | 606.0                    | 0.097<br>0.222<br>18.854 | $\pm 3/2$            | 611.7                    | 0.301<br>0.563<br>17.067 | $\pm 3/2$            |

**Table S8.** Wave functions with definite projection of the total moment  $|m_J\rangle$  for the lowest two KDs of individual Dy<sup>III</sup> fragments for complexes **1** and **2** using CASSCF/RASSI-SO with MOLCAS 8.2.

|               | $E/\text{cm}^{-1}$ | wave functions                                                                               |
|---------------|--------------------|----------------------------------------------------------------------------------------------|
| <b>1(Dy1)</b> | 0.0                | 99% $ \pm 15/2\rangle$                                                                       |
|               | 156.6              | 54% $ \pm 13/2\rangle$ +16% $ \pm 11/2\rangle$ +13% $ \pm 9/2\rangle$ +14% $ \pm 5/2\rangle$ |
| <b>1(Dy2)</b> | 0.0                | 97% $ \pm 15/2\rangle$                                                                       |
|               | 136.6              | 16% $ \pm 13/2\rangle$ +10% $ \pm 5/2\rangle$ +21% $ \pm 3/2\rangle$ +46% $ \pm 1/2\rangle$  |
| <b>2(Dy1)</b> | 0.0                | 99% $ \pm 15/2\rangle$                                                                       |
|               | 151.9              | 52% $ \pm 13/2\rangle$ +28% $ \pm 11/2\rangle$ +18% $ \pm 9/2\rangle$                        |
| <b>2(Dy2)</b> | 0.0                | 98% $ \pm 13/2\rangle$                                                                       |
|               | 165.9              | 26% $ \pm 13/2\rangle$ +9% $ \pm 5/2\rangle$ +19% $ \pm 3/2\rangle$ +41% $ \pm 1/2\rangle$   |



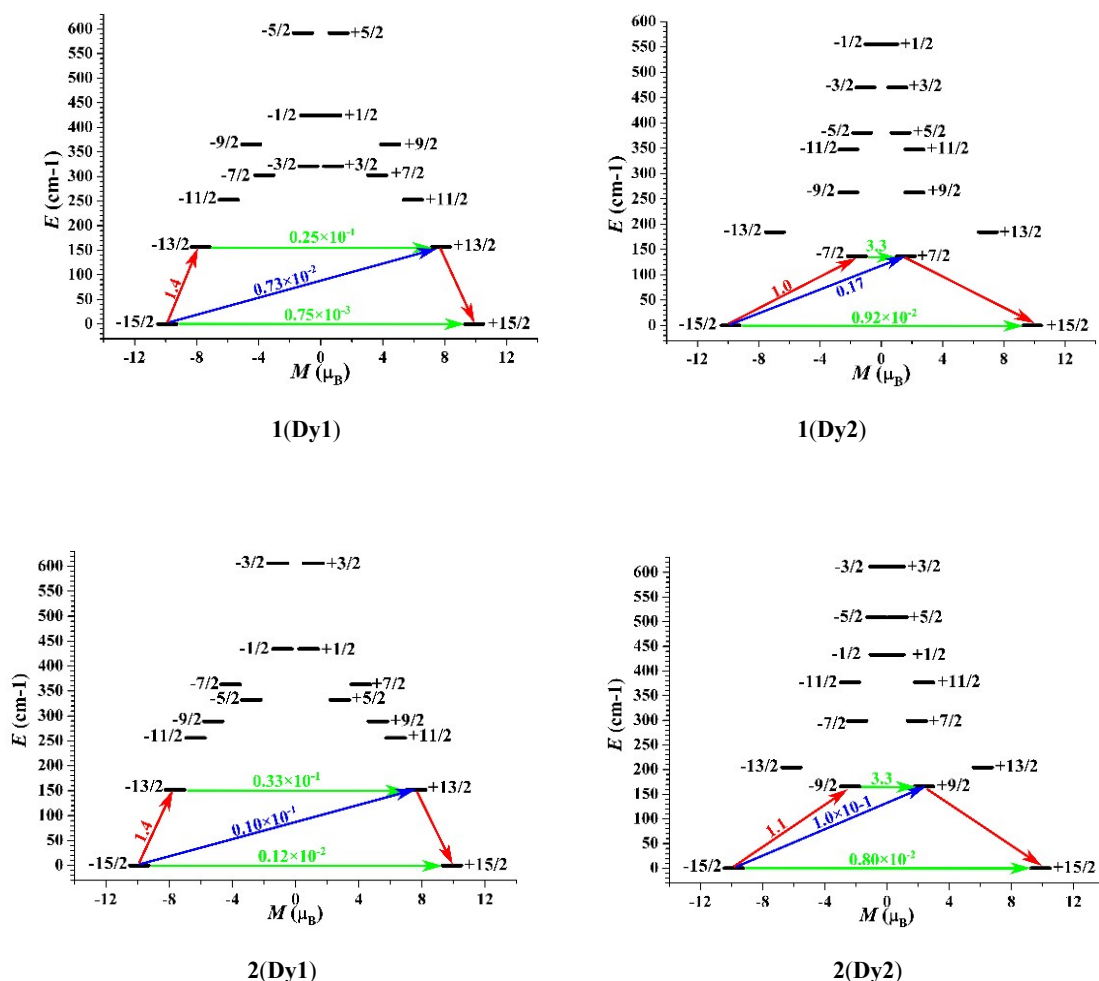

**Fig. S18.** Magnetization blocking barriers for individual Dy<sup>III</sup> fragments in complexes **1** and **2**. The thick black lines represent the KDs of the individual Dy<sup>III</sup> fragments as a function of their magnetic moment along the magnetic axis. The green lines correspond to diagonal matrix element of the transversal magnetic moment; the blue line represent Orbach relaxation processes. The path shown by the red arrows represents the most probable path for magnetic relaxation in the corresponding compounds. The numbers at each arrow stand for the mean absolute value of the corresponding matrix element of transition magnetic moment.

To fit the exchange interactions in complexes **1** and **2**, we took two steps to obtain them. Firstly, we calculated individual Dy<sup>III</sup> fragments using CASSCF/RASSI-SO to obtain the corresponding magnetic properties. Then, the exchange interaction between the magnetic centers is considered within the Lines model,<sup>S3</sup> while the account of the dipole-dipole magnetic coupling is treated exactly. The Lines model is effective and has been successfully used widely in the research field of *d* and *f*-elements single-molecule magnets.<sup>S4</sup>

For complexes **1** and **2**, there is only one type of *J*.

The Ising exchange Hamiltonian is:

$$H_{\text{exch}} = -J S_{\text{Dy}1} S_{\text{Dy}2} \quad (1)$$

The total  $J$  is the parameter of the total magnetic interaction ( $J = J_{\text{dipolar}} + J_{\text{exchange}}$ ) between magnetic center ions. The  $S_{\text{Dy}} = 1/2$  is the ground pseudospin on the Dy<sup>III</sup> site. The dipolar magnetic coupling can be calculated exactly, while the exchange coupling constants were fitted through comparison of the computed and measured magnetic susceptibility using the POLY\_ANISO program.<sup>S2</sup>

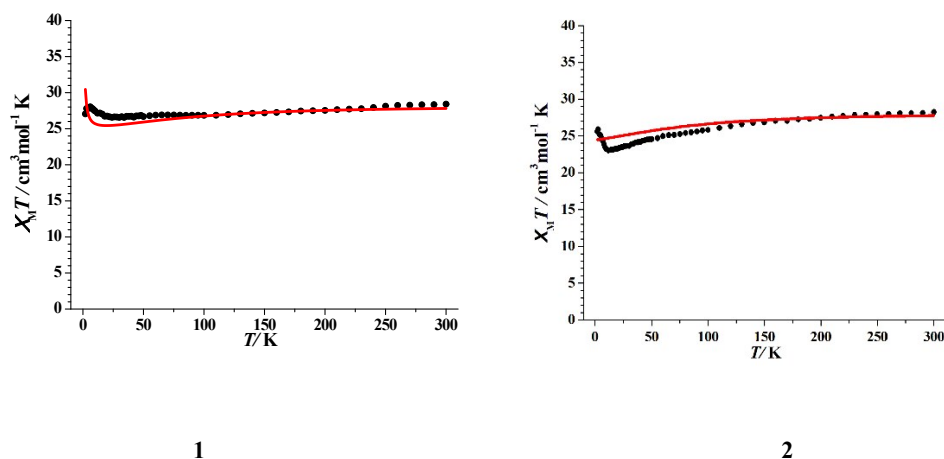

**Fig. S19.** Calculated (red solid line) and experimental (black circle dot) data of magnetic susceptibilities of **1** and **2**. The intermolecular interactions  $zJ'$  of **1** and **2** were fitted to 0.01 and 0.00  $\text{cm}^{-1}$ , respectively.

**Table S9.** Exchange energies  $E$  ( $\text{cm}^{-1}$ ), the energy difference between each exchange doublets  $\Delta_t$  ( $\text{cm}^{-1}$ ) and the main values of the  $g_z$  for the lowest two exchange doublets of **1** and **2**.

|          | <b>1</b> |                      |        | <b>2</b> |                      |        |
|----------|----------|----------------------|--------|----------|----------------------|--------|
|          | $E$      | $\Delta_t$           | $g_z$  | $E$      | $\Delta_t$           | $g_z$  |
| <b>1</b> | 0.00     | $1.7 \times 10^{-7}$ | 37.483 | 0.00     | $4.6 \times 10^{-6}$ | 37.649 |
| <b>2</b> | 0.50     | $2.5 \times 10^{-6}$ | 12.313 | 0.01     | $5.1 \times 10^{-5}$ | 11.927 |

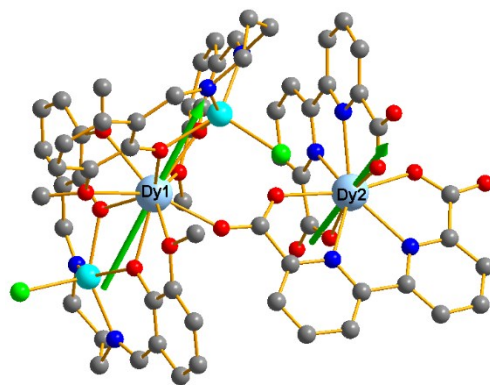

1

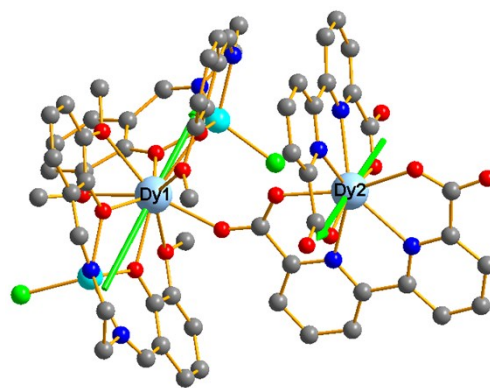

2

**Fig. S20.** Calculated orientations of the local main magnetic axes in the ground KDs on Dy<sup>III</sup> ions of complexes **1** and **2**.

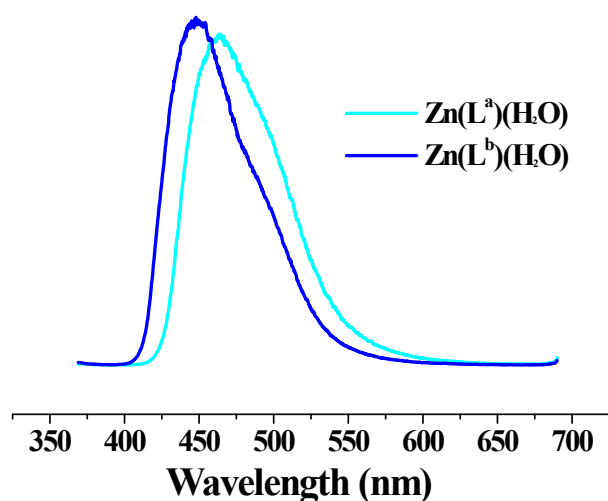

**Fig. S21.** The solid state emission spectra of  $\text{Zn}(\text{L}^{\text{a}})(\text{H}_2\text{O})$  and  $\text{Zn}(\text{L}^{\text{b}})(\text{H}_2\text{O})$  at room temperature ( $\lambda_{\text{ex}} = 350 \text{ nm}$ ).

### References:

- S1 F. Aquilante, J. Autschbach, R. K. Carlson, L. F. Chibotaru, M. G. Delcey, L. De Vico, I. Fdez. Galván, N. Ferré, L. M. Frutos, L. Gagliardi, M. Garavelli, A. Giussani, C. E. Hoyer, G. Li Manni, H. Lischka, D. Ma, P. Å. Malmqvist, T. Müller, A. Nenov, M. Olivucci, T. B. Pedersen, D. Peng, F. Plasser, B. Pritchard, M. Reiher, I. Rivalta, I. Schapiro, J. Segarra-Martí, M. Stenrup, D. G. Truhlar, L. Ungur, A. Valentini, S. Vancoillie, V. Veryazov, V. P. Vysotskiy, O. Weingart, F. Zapata, R. Lindh, MOLCAS 8: New Capabilities for Multiconfigurational Quantum Chemical Calculations across the Periodic Table, *J. Comput. Chem.*, **2016**, *37*, 506.
- S2 (a) Chibotaru, L. F.; Ungur, L.; Soncini, A. *Angew. Chem. Int. Ed.*, **2008**, *47*, 4126. (b) Ungur, L.; Van den Heuvel, W.; Chibotaru, L. F. *New J. Chem.*, **2009**, *33*, 1224. (c) Chibotaru, L. F.; Ungur, L.; Aronica, C.; Elmoll, H.; Pilet, G.; Luneau, D. *J. Am. Chem. Soc.*, **2008**, *130*, 12445.
- S3 Lines, M. E. *J. Chem. Phys.* **1971**, *55*, 2977.
- S4 (a) Mondal, K. C.; Sundt, A.; Lan, Y. H.; Kostakis, G. E.; Waldmann, O.; Ungur, L.; Chibotaru, L. F.; Anson, C. E.; Powell, A. K. *Angew. Chem. Int. Ed.* **2012**, *51*, 7550. (b) Langley, S. K.; Wielechowski, D. P.; Vieru, V.; Chilton, N. F.; Moubaraki, B.; Abrahams, B. F.; Chibotaru, L. F.; Murray, K. S. *Angew. Chem. Int. Ed.* **2013**, *52*, 12014.
